# Supplementary material for: Post-shrinkage strategies for nonlinear semiparametric regression models in low and high-dimensional settings
Source: publisher site journal article supplement (doi:10.1515/ijb-2024-0011), 2025-11-19
Supplement: Supplementary file 1 [file j_ijb-2024-0011_suppl_001.docx]

**Supplementary Material**

**Post-Shrinkage Strategies for Nonlinear Semiparametric Regression Models in Low and High-Dimensional Settings**

**S1. Asymptotic properties of the estimators**

To establish the asymptotic properties of the estimators for the low-dimensional case, we present a sequence of local alternatives and the corresponding loss functions, which are based on a positive-definite matrix ***ℶ*** in . We assume that is an estimator of where :

where is the sequence of local alternatives. The asymptotic distribution function of based on can be written as:

where >0 is a very small constant. The details are given in Ahmed (2014) and Ahmed et al. (2023). Additionally, it is important to show that is consistent for when , which is dependent on the asymptotic distribution given in (S1.2). Accordingly, if

Then, we have , where denotes the probability of convergence. Hence, is consistent with ; for details, see Mungo (2019). To establish the asymptotic normality of , the following regularity conditions can be obtained:

(R1) As ,

(R2) where is a finite, positive definte matrix where .

where in (R1) denotes the row of linearization matrix . Suppose that and and assuming that equation (S1.1) holds, the asymptotic normality of is given by,

where is an positive definite matrix. For , the submatrices of can be expressed as

,

where . Additionally, ,and for *ADR* definitions, , and finally, for . It should be mentioned that expressions (S1.2-S1.3) are provided to show the main results of the initial estimates obtained by shrinkage estimators. Under conditions (R1) and (R2), the asymptotic distributional bias (*ADB*), asymptotic covariance matrix, and asymptotic distributional risk (*ADR*) of the estimators are provided in the following theorems which can be expressed as follows:

where is a positive-definite matrix. Please note that the theorems presented here were adapted to the NSRM context from the work of Ahmed and Nicol (2012) and Yüzbaşı et al. (2020). First, the *ADB* of the introduced estimator can be expressed by:

**Theorem S1.1.** From (S1.4), under the local alternatives given in (S1.1) and the conditions (R1-R2), when

, (S1.5)

where the notation indicates the noncentral -distribution with degrees of freedom and noncentrality parameter and

*Proof* of Theorem S1.1 can be found in Yüzbaşı et al. (2020), which involves the same arguments except for the elements of that are formed by the Jacobian matrices. In the case of (S1.5), the introduced estimators are asymptotically biased. To further analyze the bias functions, their quadratic forms can be calculated, and the asymptotic quadratic bias function is defined as follows:

where is a submatrix of defined in (R2) which is used here to measure the AQDB. Then, from (S1.6), the following s are obtained:

(S1.7)

The inferences for (S1.7) are provided at the end of this section. Now, covariance matrices for the introduced estimators when are given by:

**Theorem S1.2**. Under the same conditions as Theorem S1.1, the covariance matrices are obtained as follows:

(S1.8)

For the proof of Theorem S1.2, see Yüzbaşı et al. (2020) because (S1.8) involves the same arguments. After all, for the estimators are provided in Theorem S1.3 based on local alternatives :

**Theorem S1.3.** Under the conditions (R1-R2), the sequence of local alternatives and ADRs are given by:

(S1.9)

For the proof of Theorem S1.3, see Ahmed et al. (2023). Note that the *ADB* and *ADR* inferences that are made for both shrinkage estimators and are the same as those obtained by Yüzbaşı et al. (2020), and they protect their characteristics for the NSRM (see Ahmed et al. 2023). In terms of the FM and SM estimators, and are exempt from the sparsity parameter seen in equations (S1.5), (S1.6) and (S1.9), while the opposite is true for , and . These are functions of the sparsity parameter; that is, the sparsity assumption has a very important effect on the efficiency of . On the other hand, shrinkage estimators provide more balanced performances in terms of *ADB*, *AQDB*, and *ADR*. In this case, if , the following inferences can be made for the AQDBs given in (S1.7): (i) has a constant AQDB value. (ii) As mentioned before, is a function of the sparsity parameter and is sensitive to the sparsity assumption. (iii) has the same AQDB values as when and then changes according to different values of with the log-convex function of . (iv) Finally, has very similar AQDB values with ; however, the curve of is under the curve of . Regarding the *ADR* values, under some presumed values of , and , the calculated *ADRs* in (S1.6) become . Additionally, as in the *AQDB* inferences, if , then as expected, if , then will be unbounded. Regarding , it can be concluded from Theorem S1.3 that for all and under the following conditions with the maximum characteristic roots and

**S2. Asymptotic properties for**

In this section, we obtain the *ADR* expression of the semiparametric estimators and using the WR approach. Note that in the high-dimensional case, these estimators are obtained using and based on the GN algorithm, which are denoted as and , respectively, for the final iteration. Similar to the previous section, the true regression coefficients can be separated as follows: . Furthermore, the Jacobian matrix of the partial residual matrix , where . The row of can be given by for . Furthermore, , so the nonsingularity of the Gram matrix holds. If is violated and the nonsingularity of cannot be ensured, then a pseudoinverse or generalized inverse of a matrix may be needed. Let us consider the following:

Let be an matrix that involves covariates related to weak and sparse signals. Accordingly, the matrix is written as . Hence, using and , a singular matrix with is obtained. The positive eigenvalues of are denoted as .

To establish the asymptotic properties of the shrinkage estimators, the following regularity conditions are required based upon the given notation:

**A1**. The distribution of the error terms is

**A2**. for some for given in (C2).

**A3.** where

**A4.** must ensure that , it must be a positive definite matrix, and its eigenvalues must be .

Note that condition (A1) is not rigid; it may be relaxed to some other symmetric distributions that have finite moments, but this paper focused on the normal distribution case because it is straightforward to make theoretical inferences and to avoid complexity. (A2) confirms that does not have considerably small positive eigenvalues associated with the magnitude of weak signals in . (A3) allows us to investigate the ultrahigh-dimensional data case by and to grow almost exponentially, but this paper does not focus on that. Finally, (A4) is a regularity condition for , which enables the asymptotic normality of **.**

It should be noted that if the shrinkage parameter in (S1.1) is not determined properly (i.e., is too small) and the parsimony principle is not considered in the preselection step of the WR approach, then might be observed. This case is unsuitable for employing the WR approach strategy.However, to show the *ADR* of the estimators easily and assure the model parsimony rule, it is assumed that ,as shown in Lemma S2.1.

**Lemma S2.1**. Let us consider the following sparsity assumption.

**L1**. , where .

Then, under assumptions (A1), (C1) and (L1) for , the matrix of partial residuals for covariates ensures the sparse Riesz condition (SRC) condition with rank (see Zhang and Huang, 2008). Accordingly, the subset of strong signals can be obtained based on the lasso penalty to ensure the following result:

Note that (S2.1) is satisfied by the shrinkage parameter and the properly chosen smoothing parameter .Here, the analysis continues with the following two results provided by Gao et al. (2017):

**(i)**.

**(ii)**. The sparse subset can be separated from the model, such as .

Now, we make the following assumption:

where and denote that and are known before modeling, which is a strong assumption,and is a very small constant used to create the zero neighborhood. In other words, one may know that the covariates whose contributions to the model are strong or sparse (see Saleh, 2006 for details).

Let be any estimator of the vector and , where ensures that . The *ADR* of can be written as follows:

(S2.2)

Note that is defined at the beginning of this section. Now, we impose the following **C2*** condition, which indicates the specific weak coefficients, to make analytic inferences about *ADRs,* and the remaining discussion is as follows:

**C2***. for for .

Regarding (C2*), suppose that and , where is given in (A4). Accordingly, based on , one can write as

**Theorem S2.1**. Using ,given above and in (S2.3), under assumptions (C1), (C2*), (C3) and (A1) – (A4), the following *ADR* equations can be written:

where is defined in (C2*). Note that for and , ensures that if. In (S2.4), and need to compute and , which are given by:

where , and are indicator functions. The proof of Theorem S2.1 is given in the Appendix. Theorem S2.1 makes it possible to compare the *ADRs* of the estimators , , and . Suppose that the assumptions given in Theorem S2.1 are satisfied; then,

1. In terms of a comparison of the *ADRs* of the estimators given in (6.13), the following inferences can be written: for
2. The comparison provided in (a) can be assured when for any if .
3. when under .

Thus, the asymptotic risk performance of is strongly affected by . If and are considerably large, then performs better than . Clearly, the post-selection shrinkage strategy improves the RE (or restricted least squares estimator) (see Liu and Yu, 2013) by taking into account the weak signals in . Note that if or the penalty function considered for pre-selection of the model chooses fewer variables, post-shrinkage improvement increases. On the other hand, as in Gao et al. (2017), if , as in (c), and , is the best estimator in terms of efficiency, as shown in result (c).

**S3. Tables for confusion matrix metrics**

Table S1 displays the confusion matrix scores for the SM estimator. This table shows the changes in the true coefficient detection performance of the SM selection method under different values, numbers of covariates (), and sample sizes () for the NSRM. As previously mentioned, the SM is determined using , and the results at a stable correlation level are shown in Table S1. The results of Table S1 confirm that under increasing values of , the performance of in determining the true status of the coefficient generally decreases in terms of sensitivity, specificity, and accuracy measurements. The scores in Table S1 show that these trends are similar for the NSRM. The obtained scores in Table S1 indicate that effectively extracts considerable subspace information for SM.

**Table S1**. Confusion matrix results of the SM estimator for the parametric component of the NSRM when

|  |  |  | | |  | | |  | | |
| --- | --- | --- | --- | --- | --- | --- | --- | --- | --- | --- |
|  |  | Sens. | Spec. | Acc. | Sens. | Spec. | Acc. | Sens. | Spec. | Acc. |
|  | 0.0 | 0.675 | 0.923 | 0.883 | 0.663 | 0.913 | 0.734 | 0.670 | 0.905 | 0.754 |
| 0.5 | 0.640 | 0.766 | 0.791 | 0.459 | 0.909 | 0.489 | 0.435 | 0.852 | 0.459 |
| 1.0 | 0.631 | 0.827 | 0.746 | 0.569 | 0.943 | 0.593 | 0.564 | 0.943 | 0.604 |
| 1.5 | 0.577 | 0.598 | 0.749 | 0.540 | 0.922 | 0.561 | 0.518 | 0.866 | 0.530 |
| 2.0 | 0.543 | 0.592 | 0.723 | 0.439 | 0.913 | 0.460 | 0.401 | 0.913 | 0.417 |
|  | 0.0 | 0.717 | 0.980 | 0.856 | 0.716 | 0.973 | 0.886 | 0.694 | 0.938 | 0.866 |
| 0.5 | 0.522 | 0.951 | 0.617 | 0.338 | 0.658 | 0.569 | 0.533 | 0.715 | 0.555 |
| 1.0 | 0.438 | 0.929 | 0.651 | 0.307 | 0.604 | 0.428 | 0.396 | 0.558 | 0.399 |
| 1.5 | 0.488 | 0.891 | 0.596 | 0.283 | 0.524 | 0.384 | 0.421 | 0.475 | 0.425 |
| 2.0 | 0.395 | 0.934 | 0.713 | 0.341 | 0.471 | 0.363 | 0.423 | 0.451 | 0.427 |

Table S2 involves the measures obtained from the confusion matrix similar to Table S1 given in supplementary material.

**Table S2.** Confusion matrix results for the estimators of the parametric component of the NSRM when

|  |  |  | | | | | |  | | | | | |
| --- | --- | --- | --- | --- | --- | --- | --- | --- | --- | --- | --- | --- | --- |
|  |  | Sensitivity | | Specificity | | Accuracy | | Sensitivity | | Specificity | | Accuracy | |
|  |  |  |  |  |  |  |  |  |  |  |  |  |  |
| 100 | 0.0 | 0.62 | 0.65 | 0.86 | 0.86 | 0.82 | 0.72 | 0.65 | 0.63 | 0.88 | 0.88 | 0.86 | 0.80 |
| 0.5 | 0.57 | 0.66 | 0.81 | 0.78 | 0.79 | 0.72 | 0.58 | 0.58 | 0.76 | 0.73 | 0.81 | 0.77 |
| 1.0 | 0.52 | 0.52 | 0.72 | 0.69 | 0.71 | 0.66 | 0.51 | 0.53 | 0.66 | 0.63 | 0.74 | 0.72 |
| 2.0 | 0.43 | 0.47 | 0.63 | 0.60 | 0.62 | 0.62 | 0.37 | 0.42 | 0.56 | 0.51 | 0.68 | 0.65 |
| 200 | 0.0 | 0.64 | 0.69 | 0.87 | 0.87 | 0.75 | 0.76 | 0.57 | 0.52 | 0.88 | 0.88 | 0.87 | 0.85 |
| 0.5 | 0.58 | 0.62 | 0.74 | 0.78 | 0.68 | 0.70 | 0.49 | 0.44 | 0.78 | 0.77 | 0.79 | 0.75 |
| 1.0 | 0.47 | 0.51 | 0.70 | 0.67 | 0.60 | 0.63 | 0.43 | 0.39 | 0.73 | 0.71 | 0.72 | 0.70 |
| 2.0 | 0.42 | 0.40 | 0.63 | 0.59 | 0.51 | 0.55 | 0.34 | 0.31 | 0.64 | 0.63 | 0.67 | 0.61 |

Bold indicates the best score.

Table S2 shows the sensitivity, specificity, and accuracy values obtained from all the simulation configurations. From the results, it can be said that methods provide lower sensitivity scores when than when , as expected, due to the presence of too many covariates. On the other hand, for the same reason, the specificity is higher than that of the low-dimensional case given in Table S1, which is also normal because there are too many sparse signals. Additionally, is theoretically more aggressive than , and here, has a relatively low sensitivity level that should not be interpreted as a failure of the method. The overall performances of the SM and S estimators obtained through the SCAD and aLasso methods are nearly equal.

**Appendix**

**A1. Proof of Theorem S2.1**

Before the proof simplifies the notation, let us assume that and denote the and **,** respectively**,** that areobtained from the final iteration of the GN algorithm. Similarly, and are the final GN estimators for the sparse and weak subsets. First, is obtained based on partial residuals , which are assumed to satisfy the following conditions: it is a full-ranked matrix, and is an -dimensional symmetric and inversible matrix with independent columns. Therefore, **.** Additionally, if we assume that , then is a singular matrix.

In equation (S2.4), we show that because the following expression is satisfied:

where . Based on (A1.1), equation (S2.4) can be obtained by

where will be zero due to the sparsity assumption, and we obtain:

Then, by using the definition of risk function given by Gao et al. (2017), the following statements are written:

where

where and . Hence, if (A1.3) is ensured, then equation (S2.4) can be solved. Below, more details about and are provided. Using the following equation, and are redefined.

From that

When , where is constant, given in (C1):

In (A1.6), denotes the chi-square distribution with degrees of freedom 1 and location parameter . For , we have the following algebraic operations:

Then, we know that in (A1.4) is also equal to . Similar to based on the definition of , in Section 8, can be derived as follows:

where is very similar to but different from and is given by

and based on (A1.5) . After that, in (A1.7) is expressed by

Here, , as mentioned before. Accordingly, is written as follows:

To show more clearly, some additional matrices should be defined as follows:

We need to function where . After the definitions, under the asymptotic normality assumption, can be rewritten by the following equation:

Note that (A1.10) ensures that:

and .

For further discussion, see Gao et al. (2017).,

**References**

Ahmed, S. E. *Penalty, shrinkage, and pretest strategies: variable selection and estimation* (p. 2014). New York: Springer, 2014.

Ahmed, S. E., Ahmed, F., & Yüzbaşı, B. *Post-Shrinkage Strategies in Statistical and Machine Learning for High Dimensional Data*. CRC Press, 2023.

Ahmed, S. E., & Nicol, C. J. An application of shrinkage estimation to the nonlinear regression model. *Computational Statistics & Data Analysis*, 2012: 56(11), 3309-3321.

Yüzbaşı, B., Ahmed, S. E., & Aydın, D. Ridge-type pretest and shrinkage estimations in partially linear models. Statistical papers, 2020: 61, 869-898.

Zhang, C.H. Huang, J. The sparsity and bias of the Lasso selection in high-dimensional linear regression, *The Annals of Statistics*, 2008: 36(4), 1567-1594.

Gao, X., Ahmed, S. E., & Feng, Y. Post selection shrinkage estimation for high‐dimensional data analysis. *Applied Stochastic Models in Business and Industry*, 2017: *33*(2), 97-120.

Saleh, A. M. E. *Theory of preliminary test and Stein-type estimation with applications*. John Wiley & Sons, 2006.

Liu, H., & Yu, B. Asymptotic properties of Lasso+ mLS and Lasso+ Ridge in sparse high-dimensional linear regression, *Electronic Journal of Statistics,* 2013: 7, 3124-3169
